# Supplementary material
Source: PubMed Central journal article supplement (PMC7900912)
Supplement: NIHMS1665423-supplement-Supplemental_figures_tables.pdf [file NIHMS1665423-supplement-Supplemental_figures_tables.pdf]

## Supplementary Figure S1

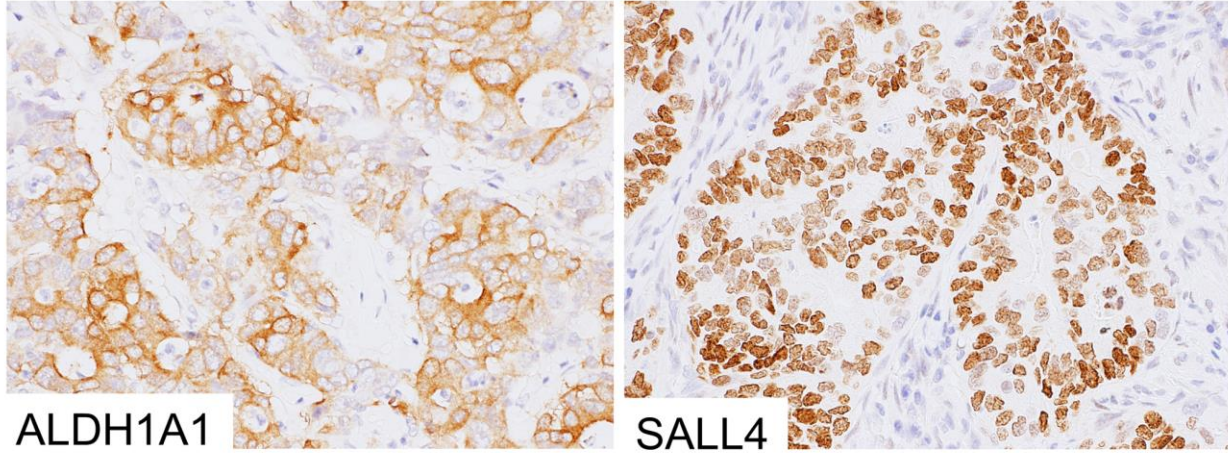

**Supplementary Figure S1. ALDH1A1 and SALL4 expression in colorectal adenocarcinoma.**  
Diffuse cytoplasmic and nuclear expression of ALDH1A1 (left) and SALL4 (right).

## Supplementary Figure S2

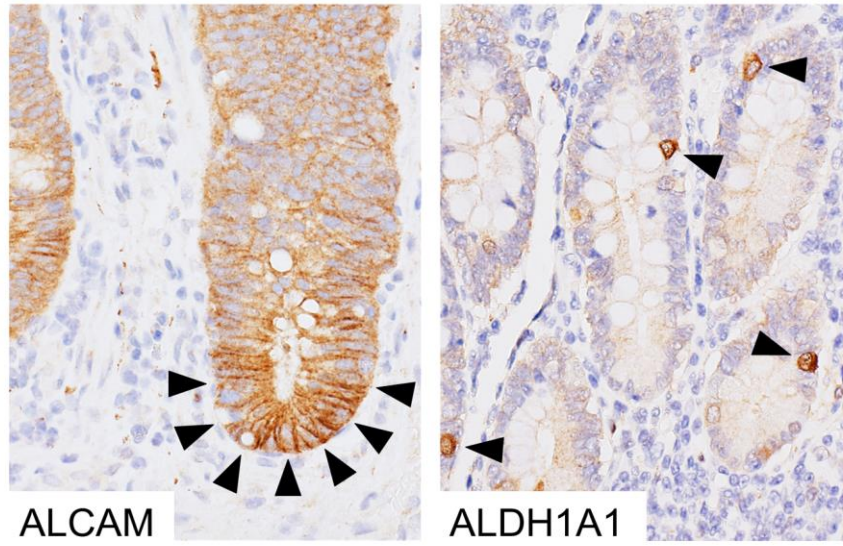

**Supplementary Figure S2. ALCAM and ALDH1A1 expression in normal intestinal epithelium.**  
Membranous-ALCAM expression in normal colonic mucosa (left) and ALDH1A1 expression in terminal ileum (right).

---

**Supplementary Table S1. Antibodies and Conditions for Immunohistochemistry**

| Genes   | Retrieval | Dilution | Antibodies                                                  |
|---------|-----------|----------|-------------------------------------------------------------|
| ALCAM   | H2        | 1,000    | Leica Biosystems, Inc. (San Diego, CA)                      |
| ALDH1A1 | H1        | 64,000   | Clone 44, BD Biosciences (San Jose, CA)                     |
| CD274   | H2        | 200      | Clone E1L3N, Cell Signaling Technology, Inc. (Danvers, MA)  |
| CDX2    | H2        | 250      | Clone D11D10, Cell Signaling Technology, Inc. (Danvers, MA) |
| SALL4   | H2        | 200      | Clone 6E3, Biocare Medical (Concord, CA)                    |

---

Antigen retrieval was performed with heat activation in Bond low (H1) or high (H2) pH buffer.

**Supplementary Table S2. Concordance Rate of Initial Immunostaining Evaluation**

| Immunohistochemistry | Concordance Rate<br>(%) | $\kappa$ coefficient | 95% CI |      |
|----------------------|-------------------------|----------------------|--------|------|
|                      |                         |                      | min    | max  |
| ALCAM                | 90.5                    | 0.75                 | 0.68   | 0.82 |
| ALDH1A1              | 87.2                    | 0.66                 | 0.58   | 0.74 |
| CD274                | 89.9                    | 0.60                 | 0.47   | 0.73 |
| CDX2                 | 97.8                    | 0.89                 | 0.82   | 0.96 |
| SALL4                | 97.8                    | 0.78                 | 0.63   | 0.93 |

$\kappa$  coefficient was calculated by EZR version 1.32. software.<sup>27</sup>

**Supplementary Table S3. Primer Sequences and PCR Conditions Used to Amplify Targets for Sanger Sequencing**

| Gene          | PCR Target | Forward primer (5'_3')   | Reverse primer (5'_3')   | A_temp (oC) | Amplicon (bp) |
|---------------|------------|--------------------------|--------------------------|-------------|---------------|
| <i>BRAF</i>   | Exon 15    | TCTTCATGAAGACCTCACAG     | AGCCTCAATTCTTACCATCC     | 50          | 125           |
| <i>GNAS</i>   | Exon 8     | CCAAACTACTCCAGACCTTT     | GGGTGAATGTCAAGAAACCA     | 48          | 221           |
| <i>KRAS</i>   | Exon 2     | GTGTGACATGTTCTAATATAGTCA | AGAATGGTCCTGCACCAGAATTAT | 48          | 215           |
| <i>KRAS</i>   | Exon 3     | CCAGACTGTGTTTCTCCCTT     | TACACAAAGAAAGCCCTCCC     | 50          | 157           |
| <i>KRAS</i>   | Exon 4     | AGAGTTAAGGACTCTGAAGA     | CAGTGTTACTTACCTGTCTT     | 45          | 220           |
| <i>NRAS</i>   | Exon 2     | GACTGAGTACAACTGGTGG      | CACCTCTATGGTGGGATCAT     | 48          | 112           |
| <i>NRAS</i>   | Exon 3     | CCCCAGGATTCTTACAGAA      | ATACACAGAGGAAGCCTTCG     | 49          | 140           |
| <i>PIK3CA</i> | Exon20-1   | AGGAGATGTGTTACAAGGCT     | TTGTGTGGAAGATCCAATCC     | 48          | 243           |
| <i>PIK3CA</i> | Exon20-2   | TGCATACATTCGAAAGACCC     | TTGTGTGGAAGATCCAATCC     | 48          | 128           |

**Supplementary Table S4. Expression of the Stem Cell Marker Genes in 454 Colorectal Adenocarcinomas**

|               | CDX2 expression      |                    |                     | <i>P</i> -value   |
|---------------|----------------------|--------------------|---------------------|-------------------|
|               | Total No.            | Negative/weak      | Strong              |                   |
|               | 454 (100%)<br>[100%] | 53 (12%)<br>[100%] | 401 (88%)<br>[100%] |                   |
| <hr/>         |                      |                    |                     |                   |
| Gene Mutation |                      |                    |                     |                   |
| ALDH1A1       |                      |                    |                     | 0.21 a            |
| Positive      | 132 (100%)<br>[29%]  | 11 (8%)<br>[21%]   | 121 (92%)<br>[30%]  |                   |
| Negative      | 322 (100%)<br>[71%]  | 42 (13%)<br>[79%]  | 280 (87%)<br>[70%]  |                   |
| ALCAM         |                      |                    |                     | <i>P</i> <0.001 a |
| Positive      | 107 (100%)<br>[24%]  | 24 (22%)<br>[45%]  | 83 (78%)<br>[21%]   |                   |
| Negative      | 347 (100%)<br>[76%]  | 29 (8%)<br>[55%]   | 318 (92%)<br>[79%]  |                   |
| SALL4         |                      |                    |                     | 0.31 b            |
| Positive      | 22 (100%)<br>[5%]    | 4 (18%)<br>[8%]    | 18 (82%)<br>[4%]    |                   |
| Negative      | 432 (100%)<br>[95%]  | 49 (11%)<br>[92%]  | 383 (89%)<br>[96%]  |                   |

<sup>a</sup> *P*-values were calculated by the Chi-square test for CDX2 expression. <sup>b</sup> *P*-values were calculated by the Fisher's exact test for CDX2 expression. The Bonferroni-corrected *P*-value for significance was *P*=0.017 (0.05/3).

**Supplementary Table S5. Characterization of 50 CD274-negative Colorectal Carcinomas**

| Age | Sex | Location  | Size (cm) | Tumor differentiation | Mucinous histology | Solid/medullary histology | CDX2 | ALCAM | ALDH1A1 | SALL4 | MLH1 | PMS2 | MSH2 | MSH6 | BRAF | KRAS             | PIK3CA        |
|-----|-----|-----------|-----------|-----------------------|--------------------|---------------------------|------|-------|---------|-------|------|------|------|------|------|------------------|---------------|
| 81  | F   | Colon NOS |           | Well                  | +                  | -                         | +    | +     | -       | -     | +    | +    | +    | +    | WT   | Codon12 GGT>TGT  | WT            |
| 54  | F   | S         | 7.0       | Well                  | -                  | -                         | +    | -     | -       | -     | +    | +    | +    | +    | WT   | Codon12 GGT>GAT  | WT            |
| 83  | F   | C         | 6.0       | Well                  | -                  | -                         | +    | -     | -       | -     | +    | +    | +    | +    | WT   | Codon12 GGT>GAT  | WT            |
| 78  | F   | C         | 6.0       | Well                  | -                  | -                         | +    | -     | -       | -     | +    | +    | +    | +    | WT   | Codon12 GGT>GTT  | WT            |
| 52  | F   | C         | 9.0       | Well                  | -                  | -                         | +    | -     | -       | -     | +    | +    | +    | +    | WT   | Codon12 GGT>TGT  | WT            |
| 87  | M   | S         | 7.0       | Moderate              | -                  | -                         | +    | +     | -       | -     | +    | +    | +    | +    | WT   | Codon12 GGT>AGT  | WT            |
| 58  | F   | C         |           | Moderate              | -                  | -                         | +    | +     | -       | -     | +    | +    | +    | +    | WT   | Codon12 GGT>GAT  | WT            |
| 77  | M   | S         | 3.0       | Moderate              | -                  | -                         | +    | -     | -       | -     | +    | +    | +    | +    | WT   | Codon12 GGT>GAT  | WT            |
| 75  | M   | C         |           | Moderate              | -                  | -                         | +    | +     | +       | -     | +    | +    | +    | +    | WT   | Codon12 GGT>GAT  | WT            |
| 64  | F   | S         | 10.0      | Moderate              | -                  | -                         | +    | -     | -       | -     | +    | +    | +    | -    | WT   | Codon12 GGT>GCT  | WT            |
| 63  | F   | S         | 6.0       | Moderate              | -                  | -                         | +    | -     | +       | -     | +    | +    | +    | +    | WT   | Codon12 GGT>GTT  | WT            |
| 49  | F   | C         |           | Moderate              | -                  | -                         | +    | +     | +       | -     | +    | +    | +    | +    | WT   | Codon12 GGT>GTT  | WT_rs17849079 |
| 77  | F   | Colon NOS | 4.0       | Moderate              | -                  | -                         | +    | -     | +       | -     | +    | +    | +    | +    | WT   | Codon12 GGT>TGT  | WT            |
| 71  | F   | Colon NOS | 4.5       | Moderate              | -                  | -                         | +    | -     | -       | -     | +    | +    | +    | +    | WT   | Codon12 GGT>TGT  | WT            |
| 71  | M   | Colon NOS | 6.5       | Moderate              | -                  | -                         | +    | +     | -       | -     | +    | +    | +    | +    | WT   | Codon12 GGT>TGT  | WT            |
| 63  | F   | T         |           | Poor                  | -                  | -                         | +    | -     | -       | -     | +    | +    | +    | +    | WT   | Codon12 GGT>TGT  | WT            |
| 43  | M   | D         | 10.0      | Well                  | -                  | -                         | +    | -     | -       | -     | -    | -    | +    | +    | WT   | Codon13 GGC>GAC  | c.3140A>G     |
| 68  | M   | C         | 5.5       | Moderate              | -                  | -                         | +    | -     | -       | -     | +    | +    | +    | +    | WT   | Codon13 GGC>GAC  | WT            |
| 74  | M   | C         | 2.3       | Well                  | -                  | -                         | +    | -     | -       | -     | +    | +    | +    | +    | WT   | Codon13 GGC>GAC  | WT            |
| 68  | M   | C         |           | Moderate              | -                  | -                         | +    | -     | -       | -     | +    | +    | +    | +    | WT   | Codon13 GGC>GAC  | WT            |
| 66  | M   | S         | 5.0       | Moderate              | -                  | -                         | +    | -     | -       | -     | +    | +    | +    | +    | WT   | Codon13 GGC>GAC  | WT            |
| 70  | F   | C         | 7.0       | Moderate              | -                  | -                         | +    | +     | -       | -     | +    | +    | +    | +    | WT   | Codon61 CAA>CAT  | WT            |
| 74  | F   | C         | 6.0       | Well                  | -                  | -                         | +    | +     | +       | -     | +    | +    | +    | +    | WT   | Codon146 GCA>ACA | WT            |
| 65  | F   | S         | 5.0       | Moderate              | -                  | -                         | +    | +     | +       | -     | +    | +    | +    | +    | WT   | Codon146 GCA>ACA | WT            |
| 40  | M   | C         | 6.5       | Moderate              | -                  | -                         | +    | +     | +       | -     | +    | +    | +    | +    | WT   | Codon146 GCA>ACA | WT            |
| 67  | F   | C         | 4.0       | Well                  | -                  | -                         | +    | -     | +       | -     | +    | +    | +    | +    | WT   | Codon146 GCA>GTA | c.3140A>T     |
| 77  | F   | C         | 5.0       | Moderate              | -                  | -                         | +    | +     | +       | -     | -    | -    | +    | +    | MUT  | WT               | WT            |
| 64  | M   | D         | 6.0       | Moderate              | -                  | -                         | +    | +     | -       | +     | +    | +    | +    | +    | MUT  | WT               | WT            |
| 65  | F   | A         | 3.7       | Moderate              | +                  | -                         | +    | -     | -       | -     | +    | +    | +    | +    | MUT  | WT               | ND            |
| 72  | M   | Colon NOS | 9.0       | Poor                  | +                  | -                         | +    | -     | -       | -     | -    | -    | +    | +    | MUT  | WT               | WT            |
| 67  | M   | C         | 9.0       | Poor                  | +                  | -                         | +    | -     | -       | -     | -    | -    | +    | +    | MUT  | WT               | WT            |
| 81  | M   | SF        |           | Well                  | -                  | -                         | +    | -     | -       | -     | +    | +    | +    | +    | WT   | WT               | WT            |
| 52  | M   | HF        | 6.0       | Well                  | -                  | -                         | +    | -     | -       | -     | +    | +    | +    | +    | WT   | WT               | WT            |
| 48  | M   | T         | 5.0       | Well                  | -                  | -                         | +    | +     | -       | -     | +    | +    | +    | +    | WT   | WT               | WT            |
| 49  | F   | T         | 7.5       | Well                  | -                  | -                         | +    | -     | -       | -     | -    | -    | +    | +    | WT   | WT               | WT            |
| 65  | F   | S         | 5.0       | Well                  | -                  | -                         | +    | -     | -       | -     | +    | +    | +    | +    | WT   | WT               | WT            |
| 74  | F   | HF        | 2.0       | Well                  | -                  | -                         | +    | -     | -       | -     | +    | +    | +    | +    | WT   | WT               | WT            |
| 74  | M   | S         | 5.5       | Well                  | -                  | -                         | +    | +     | +       | -     | +    | +    | +    | +    | WT   | WT               | WT            |

Continued

### Supplementary Table S5. Continued

| Age | Sex | Location  | Size (cm) | Tumor differentiation | Mucinous histology | Solid/medullary histology | CDX2 | ALCAM | ALDH1A1 | SALL4 | MLH1 | PMS2 | MSH2 | MSH6 | BRAF | KRAS | PIK3CA    |
|-----|-----|-----------|-----------|-----------------------|--------------------|---------------------------|------|-------|---------|-------|------|------|------|------|------|------|-----------|
| 52  | F   | T         | 3.5       | Well                  | -                  | -                         | -    | -     | +       | +     | +    | +    | +    | +    | WT   | WT   | c.3129G>A |
| 87  | M   | T         | 7.0       | Moderate              | -                  | -                         | +    | -     | +       | -     | +    | +    | +    | +    | WT   | WT   | WT        |
| 66  | M   | T         |           | Moderate              | -                  | -                         | +    | +     | +       | -     | +    | +    | +    | +    | WT   | WT   | WT        |
| 51  | F   | S         | 4.0       | Moderate              | -                  | -                         | +    | -     | +       | -     | +    | +    | +    | +    | WT   | WT   | WT        |
| 53  | M   | S         | 10.0      | Moderate              | -                  | -                         | +    | -     | -       | -     | +    | +    | +    | +    | WT   | WT   | WT        |
| 57  | F   | S         | 2.5       | Moderate              | -                  | -                         | +    | -     | -       | -     | +    | +    | +    | +    | WT   | WT   | WT        |
| 54  | M   | SF        | 4.0       | Moderate              | -                  | -                         | +    | -     | -       | -     | +    | +    | +    | +    | WT   | WT   | WT        |
| 78  | F   | C         | 6.0       | Moderate              | -                  | -                         | +    | -     | -       | -     | +    | +    | +    | +    | WT   | WT   | WT        |
| 55  | F   | S         | 4.0       | Moderate              | -                  | -                         | +    | -     | -       | -     | +    | +    | +    | +    | WT   | WT   | WT        |
| 80  | M   | Colon NOS | 4.0       | Moderate              | -                  | -                         | +    | -     | -       | -     | +    | +    | +    | +    | WT   | WT   | WT        |
| 43  | F   | S         | 7.0       | Moderate              | -                  | -                         | +    | -     | -       | -     | +    | +    | +    | +    | WT   | WT   | WT        |
| 59  | F   | Colon NOS | 4.0       | Moderate              | -                  | -                         | +    | -     | +       | -     | +    | +    | +    | +    | WT   | WT   | WT        |

C, cecum; D, disending; HF, hepatic flexure; S, sigmoid; SF, splenic flexure; T, transverse. WT, wild type. MUT, V600E mutant. ND, not determined. No mutations were found in *NRAS* and *GNAS*.
